# Supplementary material for: The impact of using BARCIST 1.0 criteria on quantification of BAT volume and activity in three independent cohorts of adults
Source: PubMed Central journal article supplement (PMC5986766; doi:10.1038/s41598-018-26878-4), 2018-06-04
Supplement: 41598_2018_26878_MOESM1_ESM.pdf [file 41598_2018_26878_MOESM1_ESM.pdf]

**The impact of using BARCIST 1.0 criteria on quantification of BAT volume and activity in three independent cohorts of adults**

Borja Martinez-Tellez, Kimberly J. Nahon, Guillermo Sanchez-Delgado, Gustavo Abreu-Vieira, Jose M. Llamas-Elvira, Floris HP. van Velden, Lenka Pereira Arias-Bouda, Patrick C.N. Rensen, Mariëtte R. Boon, Jonatan R. Ruiz

**Table S1.** Hounsfield Units and standardized uptake value thresholds and software used in BAT human studies from 1st of January 2007 to 10th of March 2017

| <b>Studies</b>                         | <b>Hounsfield units</b> | <b>Standardized uptake values</b> | <b>Software to quantify BAT</b> |
|----------------------------------------|-------------------------|-----------------------------------|---------------------------------|
| Hadi et al. 2007 <sup>1</sup>          | NR                      | NR                                | NR                              |
| Kim et al. 2008 <sup>2</sup>           | NR                      | NR                                | NR                              |
| Alkhalwaldeh et al. 2008 <sup>3</sup>  | NR                      | NR                                | NR                              |
| Basu et al. 2008 <sup>4</sup>          | NR                      | NR                                | NR                              |
| Zukotynski et al. 2009 <sup>5</sup>    | NR                      | NR                                | NR                              |
| Cypess et al. 2009 <sup>6</sup>        | -250,-50                | 2.0                               | PET/CT viewer shareware         |
| Van Marken et al. 2009 <sup>7</sup>    | NR                      | NR                                | PMOD 2.85                       |
| Virtanen et al. 2009 <sup>8</sup>      | NR                      | NR                                | NR                              |
| Saito et al. 2009 <sup>9</sup>         | NR                      | NR                                | VOX-BASE                        |
| Au-Yong et al. 2009 <sup>10</sup>      | Not used                | Not used                          | Leonardo workstation            |
| Paidisetty et al. 2009 <sup>11</sup>   | NR                      | NR                                | NR                              |
| Lee et al. 2010 <sup>12</sup>          | -250,-50                | 2.0                               | NR                              |
| Skarulis et al. 2010 <sup>13</sup>     | NR                      | NR                                | MEDx image                      |
| Aukema et al. 2010 <sup>14</sup>       | NR                      | NR                                | Osirix DICOM viewer             |
| Pfannenbergh et al. 2010 <sup>15</sup> | -250,-50                | 2.0                               | NR                              |
| Park et al. 2010 <sup>16</sup>         | NR                      | NR                                | NR                              |
| Zukotynski et al. 2010 <sup>17</sup>   | NR                      | NR                                | NR                              |
| Garcia et al. 2010 <sup>18</sup>       | NR                      | NR                                | NR                              |
| Rakheja et al. 2011 <sup>19</sup>      | NR                      | NR                                | NR                              |
| Ouellet et al. 2011 <sup>20</sup>      | -100,-10                | 1.0                               | MIM software                    |
| Pace et al. 2011 <sup>21</sup>         | -250,-50                | NR                                | Volumetrix                      |
| Orava et al. 2011 <sup>22</sup>        | NR                      | NR                                | NR                              |
| Vijgen et al. 2011 <sup>23</sup>       | NR                      | NR                                | NR                              |
| Lee et al. 2011 <sup>24</sup>          | NR                      | 2.0                               | NR                              |
| Lee et al. 2011 <sup>25</sup>          | NR                      | 2.0                               | NR                              |
| Jacene et al. 2011 <sup>26</sup>       | NR                      | NR                                | NR                              |
| Huang et al. 2011 <sup>27</sup>        | -250,-50                | 2.0                               | OsiriX 64-bit software          |
| Yoneshiro et al. 2011 <sup>28</sup>    | NR                      | NR                                | VOX-BASE workstation            |
| Yilmaz et al. 2011 <sup>29</sup>       | NR                      | NR                                | NR                              |
| Yoneshiro et al. 2012 <sup>30</sup>    | NR                      | 2.0                               | VOX-BASE workstation            |
| Vrieze et al. 2012 <sup>31</sup>       | -250,-50                | 2.0                               | Hybrid Viewer; HERMES           |
| Muzik et al. 2012 <sup>32</sup>        | -250,-50                | 2.0                               | NR                              |
| Vijgen et al. 2012 <sup>33</sup>       | NR                      | NR                                | PMOD 2.85                       |
| Chalfant et al. 2012 <sup>34</sup>     | NR                      | NR                                | SliceOmatic image software      |
| Vosselman et al. 2012 <sup>35</sup>    | -180,-10                | 1.5                               | PMOD 3.0                        |
| Cypess et al. 2012 <sup>36</sup>       | -250,-10                | 2.0                               | PET/CT Viewer shareware         |
| Ouellet et al. 2012 <sup>37</sup>      | -100, -10               | 1.0                               | NR                              |
| Bredella et al. 2012 <sup>38</sup>     | -250, -50               | 70%SUV <sub>max</sub>             | PET/CT Viewer shareware         |
| Miao et al. 2012 <sup>39</sup>         | -250, -50               | NR                                | PET/CT Viewer shareware         |
| Vogel et al. 2012 <sup>40</sup>        | NR                      | NR                                | Osirix DICOM viewer             |
| Schlögl et al. 2013 <sup>41</sup>      | -250, -10               | 2.0                               | SPM8                            |
| Ahmadi et al. 2013 <sup>42</sup>       | -87, -10                | NR                                | NR                              |
| Banzo et al. 2013 <sup>43</sup>        | NR                      | NR                                | NR                              |
| Carey et al. 2013 <sup>44</sup>        | -180, -10               | 1.0                               | Extended BrillianceWorkstation  |
| Ruth et al. 2013 <sup>45</sup>         | -200,-10                | 2.0                               | Mathworks, Natick, MA           |
| Lee et al. 2013 <sup>46</sup>          | NR                      | 2.0                               | IDL software                    |

|                                         |           |           |                                |
|-----------------------------------------|-----------|-----------|--------------------------------|
| Pasanisi et al. 2013 <sup>47</sup>      | -250, -50 | NR        | Volumetrix                     |
| Sugita et al. 2013 <sup>48</sup>        | NR        | 2.0       | VOX-BASE workstation           |
| Van Rooijen et al. 2013 <sup>49</sup>   | -150, -50 | NR        | PMOD                           |
| Yonshiro et al. 2013 <sup>50</sup>      | NR        | 2.0       | VOX-BASE workstation           |
| Yonshiro et al. 2013 <sup>51</sup>      | NR        | 2.0       | VOX-BASE workstation           |
| Yonshiro et al. 2013 <sup>52</sup>      | NR        | 2.0       | VOX-BASE workstation           |
| Orava et al. 2013 <sup>53</sup>         | NR        | NR        | NR                             |
| Muzik et al. 2013 <sup>54</sup>         | -250,-50  | 2.0       | AMIDE software                 |
| Chen et al. 2013 <sup>55</sup>          | NR        | 2.0       | NR                             |
| Vosselman et al. 2013 <sup>56</sup>     | -180, -10 | 1.5       | PMOD 3.0                       |
| Perkins et al. 2013 <sup>57</sup>       | -250, -50 | No limit  | Syngo MI workplace             |
| Bredella et al. 2013 <sup>58</sup>      | -250, -50 | 70%SUVmax | PET/CT Viewer shareware        |
| van der Lans et al. 2013 <sup>59</sup>  | -180, -10 | 1.5       | PMOD 3.0                       |
| Zhang et al. 2013 <sup>60</sup>         | -250, -50 | 2.0       | PET/CT viewer software         |
| Admiraal et al. 2013 <sup>61</sup>      | -250, -50 | 2.0       | Hermes Hybrid Viewer           |
| Admiraal et al. 2013 <sup>62</sup>      | -250, -50 | 2.0       | Hermes Hybrid Viewer           |
| Persichetti et al. 2013 <sup>63</sup>   | -250, -50 | 2.0       | MIM software                   |
| Vijgen et al. 2013 <sup>64</sup>        | NR        | NR        | PMOD                           |
| Boon et al. 2014 <sup>65</sup>          | Not used  | 2.0       | Hermes Hybrid Viewer           |
| Lee et al. 2014 <sup>66</sup>           | -300,-10  | 2.0       | NR                             |
| Lee et al. 2014 <sup>67</sup>           | -300, -10 | 2.0       | Software built with IDL        |
| Jang et al. 2014 <sup>68</sup>          | NR        | 1.5       | syngo.via software             |
| Chondronikola et al. 2014 <sup>69</sup> | -100, -10 | 1.0       | NR                             |
| Schopman et al. 2014 <sup>70</sup>      | -250,-50  | 2.0       | Hybrid Viewer; HERMES          |
| Blondin et al. 2014 <sup>71</sup>       | -150,-30  | 1.5       | NR                             |
| Bakker et al. 2014 <sup>72</sup>        | Not used  | 2.0       | Hermes Hybrid Viewer           |
| Zhang et al. 2014 <sup>73</sup>         | -250, -50 | 2.0       | NR                             |
| Matsushita et al. 2014 <sup>74</sup>    | Not used  | 2.0       | VOX-BASE workstation           |
| Vosselman et al. 2014 <sup>75</sup>     | -180, -10 | 1.5       | NR                             |
| Zhang et al. 2014 <sup>76</sup>         | NR        | NR        | PET/CT Viewer shareware        |
| Choi et al. 2014 <sup>77</sup>          | -250,-50  | 2.0       | Extended Brilliance Workspace  |
| Bredella et al. 2014 <sup>78</sup>      | -250, -50 | 70%SUVmax | PET/CT Viewer shareware        |
| Orava et al. 2014 <sup>79</sup>         | Not used  | 1.14      | Vinci 2.54.0 software          |
| Cao et al. 2014 <sup>80</sup>           | NR        | NR        | NR                             |
| Hanssen et al. 2015 <sup>81</sup>       | -180, -10 | 1.5       | PMOD 3.0                       |
| Hanssen et al. 2015 <sup>82</sup>       | -180, -10 | 1.5       | PMOD 3.0                       |
| Hanssen et al. 2015 <sup>83</sup>       | -180, -10 | 1.5       | PMOD 3.0                       |
| Blondin et al. 2015 <sup>84</sup>       | -150, -30 | 1.5       | NR                             |
| Blondin et al. 2015 <sup>85</sup>       | -150, -30 | 1.5       | NR                             |
| Dinas et al. 2015 <sup>86</sup>         | Not used  | Not limit | NR                             |
| Vosselman et al. 2015 <sup>87</sup>     | -180, -10 | 1.5       | PMOD 3.0                       |
| Cypess et al. 2015 <sup>88</sup>        | -250,-10  | 2.0       | PET/CT Viewer shareware        |
| Nirengi et al. 2015 <sup>89</sup>       | -300, -10 | 2.0       | VOX-BASE workstation           |
| Carey et al. 2015 <sup>90</sup>         | -180,-10  | 2.0       | Extended BrillianceWorkstation |
| Wei et al. 2015 <sup>91</sup>           | -150,-30  | 2.5       | PET/CT viewer shareware        |
| Butler et al. 2015 <sup>92</sup>        | -250,-50  | 2.0       | NR                             |
| Raiko et al. 2015 <sup>93</sup>         | NR        | NR        | NR                             |
| Wang et al. 2015 <sup>94</sup>          | -250,-50  | 2.0       | Volume Viewer software         |
| Puar et al. 2016 <sup>95</sup>          | -180, -10 | 1.5       | Inveon Research software       |
| Hanssen et al. 2016 <sup>96</sup>       | -180, -10 | 1.5       | PMOD 3.0                       |

|                                          |           |           |                                   |
|------------------------------------------|-----------|-----------|-----------------------------------|
| Singhal et al. 2016 <sup>97</sup>        | -250, -10 | 1.0 to 30 | Fiji Software                     |
| Oxguven et al. 2016 <sup>98</sup>        | -250,-50  | 2.0       | Advantage Windows Workstation 4.5 |
| Chondronikola et al. 2016 <sup>99</sup>  | -190, -30 | 1.5       | MIM software                      |
| Chondronikola et al. 2016 <sup>100</sup> | NR        | NR        | NR                                |
| Gifford et al. 2016 <sup>101</sup>       | -200, -1  | No limits | NR                                |
| Yoneshiro et al. 2016 <sup>102</sup>     | Not used  | 2.0       | NR                                |
| Ramage et al. 2016 <sup>103</sup>        | -150, -30 | 2.0       | PMOD 3.409                        |
| Bahler et al. 2016 <sup>104</sup>        | NR        | NR        | NR                                |
| Bahler et al. 2016 <sup>105</sup>        | -250,-50  | 2.0       | Hermes Hybrid Viewer              |
| Salem et al. 2016 <sup>106</sup>         | -150, -5  | 2.0       | NR                                |
| Bahler et al. 2016 <sup>107</sup>        | -250,-50  | 2.0       | Hermes Hybrid Viewer              |
| Van der Lans et al. 2016 <sup>108</sup>  | -180, -10 | 1.5       | PMOD 3.0                          |
| Gatidis et al. 2016 <sup>109</sup>       | NR        | NR        | NR                                |
| Nirengi et al. 2016 <sup>110</sup>       | NR        | NR        | NR                                |
| Shao et al. 2016 <sup>111</sup>          | -100, -10 | 1.0       | TrueD system                      |
| Hibi et al. 2016 <sup>112</sup>          | Not used  | 2.0       | VOX-BASE workstation              |
| Chen et al. 2016 <sup>113</sup>          | -180, -10 | 1.5       | NR                                |
| Lee et al. 2016 <sup>114</sup>           | -300, -10 | 2.0       | Software built with IDL           |
| Becker et al. 2016 <sup>115</sup>        | -250, -50 | 3.0       | AW version 4.6, GE Healthcare     |
| Takx et al. 2016 <sup>116</sup>          | -250, -50 | 2.0       | TrueD system                      |
| Shao et al. 2016 <sup>117</sup>          | -250, -50 | 2.0       | Syngo True D system               |
| Muzik et al. 2016 <sup>118</sup>         | -250, -50 | 2.0       | AMIDE software                    |
| Blondin et al. 2016 <sup>119</sup>       | -150, -30 | 1.5       | NR                                |
| Blondin et al. 2017 <sup>120</sup>       | NR        | NR        | NR                                |
| Gerngrob et al. 2017 <sup>121</sup>      | -250, -50 | 2.0       | "SYNGO" workstation (Siemens)     |
| Hussein et al. 2017 <sup>122</sup>       | -190,-30  | 2.0       | NR                                |
| Yoneshiro et al. 2017 <sup>123</sup>     | -300, -10 | 2.0       | NR                                |

NR: Not reported or cited in the study.

## REFERENCES

1. Hadi, M., Chen, C. C., Whatley, M., Pacak, K. & Carrasquillo, J. a. Brown fat imaging with (18)F-6-fluorodopamine PET/CT, (18)F-FDG PET/CT, and (123)I-MIBG SPECT: a study of patients being evaluated for pheochromocytoma. *J. Nucl. Med.* **48**, 1077–83 (2007).
2. Kim, S., Krynyckyi, B. R., Machac, J. & Kim, C. K. Temporal relation between temperature change and FDG uptake in brown adipose tissue. *Eur. J. Nucl. Med. Mol. Imaging* **35**, 984–989 (2008).
3. Alkhaldeh, K. & Alavi, A. Quantitative assessment of FDG uptake in brown fat using standardized uptake value and dual-time-point scanning. *Clin. Nucl. Med.* **33**, 663–7 (2008).
4. Basu, S. & Alavi, A. Optimizing interventions for preventing uptake in the brown adipose tissue in FDG-PET. *Eur. J. Nucl. Med. Mol. Imaging* **35**, 1421–3 (2008).
5. Zukotynski, K. A. *et al.* Constant ambient temperature of 24 degrees C significantly reduces FDG uptake by brown adipose tissue in children scanned during the winter. *Eur. J. Nucl. Med. Mol. Imaging* **36**, 602–6 (2009).
6. Cypess, A. M. *et al.* Identification and importance of brown adipose tissue in adult humans. *N. Engl. J. Med.* **360**, 1509–17 (2009).
7. van Marken Lichtenbelt, W. D. *et al.* Cold-activated brown adipose tissue in healthy men. *N. Engl. J. Med.* **360**, 1500–8 (2009).
8. Virtanen, K. A. *et al.* Functional brown adipose tissue in healthy adults. *N. Engl. J. Med.* **360**, 1518–1525 (2009).
9. Saito, M. *et al.* High incidence of metabolically active brown adipose tissue in healthy adult humans: effects of cold exposure and adiposity. *Diabetes* **58**, 1526–1531 (2009).

10. Au-yong, I. T. H., Thorn, N., Ganatra, R., Perkins, A. C. & Symonds, M. E. Brown Adipose Tissue and Seasonal Variation in Humans. *October* **58**, (2009).
11. Paidisetty, S. & Blodgett, T. M. Brown fat: atypical locations and appearances encountered in PET/CT. *AJR. Am. J. Roentgenol.* **193**, 359–66 (2009).
12. Lee, P. *et al.* A critical appraisal of the prevalence and metabolic significance of brown adipose tissue in adult humans. 601–606 (2010). doi:10.1152/ajpendo.00298.2010.
13. Skarulis, M. C. *et al.* Thyroid hormone induced brown adipose tissue and amelioration of diabetes in a patient with extreme insulin resistance. *J. Clin. Endocrinol. Metab.* **95**, 256–62 (2010).
14. Aukema, T. S., Vogel, W. V, Hoefnagel, C. A. & Valdés Olmos, R. a. Prevention of brown adipose tissue activation in 18F-FDG PET/CT of breast cancer patients receiving neoadjuvant systemic therapy. *J. Nucl. Med. Technol.* **38**, 24–7 (2010).
15. Pfannenber, C. *et al.* Impact of age on the relationships of brown adipose tissue with sex and adiposity in humans. *Diabetes* **59**, 1789–1793 (2010).
16. Park, S. A. *et al.* Normal physiologic and benign foci with F-18 FDG avidity on PET/CT in patients with breast cancer. *Nucl. Med. Mol. Imaging (2010).* **44**, 282–289 (2010).
17. Zukotynski, K. A. *et al.* Seasonal variation in the effect of constant ambient temperature of 24°C in reducing FDG uptake by brown adipose tissue in children. *Eur. J. Nucl. Med. Mol. Imaging* **37**, 1854–1860 (2010).
18. Garcia, C. *et al.* Effective reduction of brown fat FDG uptake by controlling environmental temperature prior to PET scan: An expanded case series. *Mol. Imaging Biol.* **12**, 652–656 (2010).
19. Rakheja, R., Ciarallo, A., Alabed, Y. Z. & Hickeson, M. Intravenous administration of diazepam significantly reduces brown fat activity on 18F-FDG PET/CT. *Am. J. Nucl. Med. Mol. Imaging* **1**, 29–35 (2011).
20. Ouellet, V. *et al.* Outdoor temperature, age, sex, body mass index, and diabetic status determine the prevalence, mass, and glucose-uptake activity of 18F-FDG-detected BAT in humans. *J. Clin. Endocrinol. Metab.* **96**, 192–199 (2011).
21. Pace, L. *et al.* Determinants of physiologic 18F-FDG uptake in brown adipose tissue in sequential PET/CT examinations. *Mol. Imaging Biol.* **13**, 1029–1035 (2011).
22. Orava, J. *et al.* Different metabolic responses of human brown adipose tissue to activation by cold and insulin. *Cell Metab.* **14**, 272–279 (2011).
23. Vijgen, G. H. E. J. *et al.* Brown adipose tissue in morbidly obese subjects. *PLoS One* **6**, 2–7 (2011).
24. Lee, P. *et al.* High prevalence of brown adipose tissue in adult humans. *J. Clin. Endocrinol. Metab.* **96**, 2450–2455 (2011).
25. Lee, P., Swarbrick, M. M., Zhao, J. T. & Ho, K. K. Y. Inducible brown adipogenesis of supraclavicular fat in adult humans. *Endocrinology* **152**, 3597–3602 (2011).
26. Jacene, H. A., Cohade, C. C., Zhang, Z. & Wahl, R. L. The relationship between patients' serum glucose levels and metabolically active brown adipose tissue detected by PET/CT. *Mol. Imaging Biol.* **13**, 1278–83 (2011).
27. Huang, Y.-C. *et al.* The relationship between brown adipose tissue activity and neoplastic status: an (18)F-FDG PET/CT study in the tropics. *Lipids Health Dis.* **10**, 238 (2011).
28. Yoneshiro, T. *et al.* Brown Adipose Tissue, Whole-Body Energy Expenditure, and Thermogenesis in Healthy Adult Men. *Obesity* **19**, 13–16 (2011).
29. Yilmaz, Y. *et al.* Association between the presence of brown adipose tissue and non-alcoholic fatty liver disease in adult humans. *Aliment. Pharmacol. Ther.* **34**, 318–23 (2011).
30. Yoneshiro, T., Aita, S., Kawai, Y., Iwanaga, T. & Saito, M. Nonpungent capsaicin analogs (capsinoids) increase energy expenditure through the activation of brown adipose tissue in humans. *Am. J. Clin. Nutr.* **95**, 845–850 (2012).
31. Vrieze, A. *et al.* Fasting and postprandial activity of brown adipose tissue in healthy men. *J. Nucl. Med.* **53**, 1407–1410 (2012).

32. Muzik, O., Mangner, T. J. & Granneman, J. G. Assessment of oxidative metabolism in brown fat using PET imaging. *Front. Endocrinol. (Lausanne)*. **3**, 15 (2012).
33. Vijgen, G. H. E. J. *et al.* Increase in brown adipose tissue activity after weight loss in morbidly obese subjects. *J. Clin. Endocrinol. Metab.* **97**, E1229-33 (2012).
34. Chalfant, J. S. *et al.* Inverse association between brown adipose tissue activation and white adipose tissue accumulation in successfully treated pediatric malignancy. *Am. J. Clin. Nutr.* **95**, 1144–1149 (2012).
35. Vosselman, M. J. *et al.* Systemic  $\beta$ -adrenergic stimulation of thermogenesis is not accompanied by brown adipose tissue activity in humans. *Diabetes* **61**, 3106–3113 (2012).
36. Cypess, A. M. *et al.* Cold but not sympathomimetics activates human brown adipose tissue in vivo. *Proc. Natl. Acad. Sci. U. S. A.* **109**, 10001–10005 (2012).
37. Ouellet, V. *et al.* Brown adipose tissue oxidative metabolism contributes to energy expenditure during acute cold exposure in humans. *J. Clin. Invest.* **122**, 545–552 (2012).
38. Bredella, M. A. *et al.* Young women with cold-activated brown adipose tissue have higher bone mineral density and lower Pref-1 than women without brown adipose tissue: A study in women with anorexia nervosa, women recovered from anorexia nervosa, and normal-weight women. *J. Clin. Endocrinol. Metab.* **97**, 584–590 (2012).
39. Miao, Q. *et al.* Stability in brain glucose metabolism following brown adipose tissue inactivation in chinese adults. *AJNR. Am. J. Neuroradiol.* **33**, 1464–9 (2012).
40. Vogel, W. V. *et al.* Intervention to Lower Anxiety of 18F-FDG PET/CT Patients by Use of Audiovisual Imagery During the Uptake Phase Before Imaging. *J. Nucl. Med. Technol.* **40**, 92–98 (2012).
41. Schlögl, M. *et al.* Overfeeding over 24 hours does not activate brown adipose tissue in humans. *J. Clin. Endocrinol. Metab.* **98**, 1956–1960 (2013).
42. Ahmadi, N. *et al.* Accurate detection of metabolically active ‘brown’ and ‘white’ adipose tissues with computed tomography. *Acad. Radiol.* **20**, 1443–1447 (2013).
43. Banzo, J. *et al.* Extensive hypermetabolic pattern of brown adipose tissue activation on 18F-FDG PET/CT in a patient diagnosed of catecholamine-secreting para-vesical paraganglioma. *Rev. Esp. Med. Nucl. Imagen Mol.* **32**, 397–399 (2013).
44. Carey, A. L. *et al.* Ephedrine activates brown adipose tissue in lean but not obese humans. *Diabetologia* **56**, 147–155 (2013).
45. Ruth, M. R., Wellman, T., Mercier, G., Szabo, T. & Apovian, C. M. An automated algorithm to identify and quantify brown adipose tissue in human 18F-FDG-PET/CT scans. *Obesity (Silver Spring)*. **21**, 1554–60 (2013).
46. Lee, P. *et al.* Cold-activated brown adipose tissue is an independent predictor of higher bone mineral density in women. *Osteoporos. Int.* **24**, 1513–1518 (2013).
47. Pasanisi, F. *et al.* Evidence of brown fat activity in constitutional leanness. *J. Clin. Endocrinol. Metab.* **98**, 1214–1218 (2013).
48. Sugita, J. *et al.* Grains of paradise (*Aframomum melegueta*) extract activates brown adipose tissue and increases whole-body energy expenditure in men. *Br. J. Nutr.* 1–6 (2013). doi:10.1017/S0007114512005715
49. van Rooijen, B. D. *et al.* Imaging cold-activated brown adipose tissue using dynamic T2\*-weighted magnetic resonance imaging and 2-deoxy-2-[18F]fluoro-D-glucose positron emission tomography. *Invest. Radiol.* **48**, 708–14 (2013).
50. Yoneshiro, T. *et al.* Recruited brown adipose tissue as an antiobesity agent in humans. *J. Clin. Invest.* **123**, 3404–3408 (2013).
51. Yoneshiro, T. *et al.* Impact of UCP1 and  $\beta$ 3AR gene polymorphisms on age-related changes in brown adipose tissue and adiposity in humans. *Int. J. Obes. (Lond)*. **37**, 993–998 (2013).
52. Yoneshiro, T. *et al.* Age-related decrease in cold-activated brown adipose tissue and accumulation of body fat in healthy humans. *Obesity (Silver Spring)*. **19**, 1755–60 (2011).

53. Orava, J. *et al.* Blunted metabolic responses to cold and insulin stimulation in brown adipose tissue of obese humans. *Obesity* **21**, 2279–2287 (2013).
54. Muzik, O. *et al.* 150 PET measurement of blood flow and oxygen consumption in cold-activated human brown fat. *J. Nucl. Med.* **54**, 523–31 (2013).
55. Chen, K. Y. *et al.* Brown fat activation mediates cold-induced thermogenesis in adult humans in response to a mild decrease in ambient temperature. *J. Clin. Endocrinol. Metab.* **98**, 1218–1223 (2013).
56. Vosselman, M. J. *et al.* Brown adipose tissue activity after a high-calorie meal in humans. *Am. J. Clin. Nutr.* **98**, 57–64 (2013).
57. Perkins, A. C., Mshelia, D. S., Symonds, M. E. & Sathekge, M. Prevalence and pattern of brown adipose tissue distribution of 18F-FDG in patients undergoing PET-CT in a subtropical climatic zone. *Nucl. Med. Commun.* **34**, 168–74 (2013).
58. Bredella, M. A., Fazeli, P. K., Lecka-Czernik, B., Rosen, C. J. & Klibanski, A. IGFBP-2 is a negative predictor of cold-induced brown fat and bone mineral density in young non-obese women. *Bone* **53**, 336–339 (2013).
59. van der Lans, A. A. J. J. *et al.* Cold acclimation recruits human brown fat and increases nonshivering thermogenesis. *J. Clin. Invest.* **123**, 3395–3403 (2013).
60. Zhang, Q. *et al.* Differences in the metabolic status of healthy adults with and without active brown adipose tissue. *Wien. Klin. Wochenschr.* **125**, 687–695 (2013).
61. Admiraal, W. M. *et al.* Cold-induced activity of brown adipose tissue in young lean men of South-Asian and European origin. *Diabetologia* **56**, 2231–2237 (2013).
62. Admiraal, W. M. *et al.* Combining 123I-metaiodobenzylguanidine SPECT/CT and 18F-FDG PET/CT for the assessment of brown adipose tissue activity in humans during cold exposure. *J Nucl Med* **54**, 208–212 (2013).
63. Persichetti, A. *et al.* Prevalence, Mass, and Glucose-Uptake Activity of 18F-FDG-Detected Brown Adipose Tissue in Humans Living in a Temperate Zone of Italy. *PLoS One* **8**, 1–8 (2013).
64. Vijgen, G. H. E. J. *et al.* Vagus nerve stimulation increases energy expenditure: relation to brown adipose tissue activity. *PLoS One* **8**, e77221 (2013).
65. Boon, M. R. *et al.* Supraclavicular Skin Temperature as a Measure of 18F-FDG Uptake by BAT in Human Subjects. *PLoS One* **9**, e98822 (2014).
66. Lee, P. *et al.* Irisin and FGF21 are cold-induced endocrine activators of brown fat function in humans. *Cell Metab.* **19**, 302–309 (2014).
67. Lee, P. *et al.* Temperature-acclimated brown adipose tissue modulates insulin sensitivity in humans. *Diabetes* **177**, 1–59 (2014).
68. Jang, C. *et al.* Infrared thermography in the detection of brown adipose tissue in humans. *Physiol. Rep.* **2**, 1–7 (2014).
69. Chondronikola, M. *et al.* Brown Adipose Tissue Improves Whole Body Glucose Homeostasis and Insulin Sensitivity in Humans. *Diabetes* **63**, 4089–4099 (2014).
70. Schopman, J. E. *et al.* (18)F-fluorodeoxyglucose uptake in brown adipose tissue during insulin-induced hypoglycemia and mild cold exposure in non-diabetic adults. *Metabolism.* **63**, 1280–6 (2014).
71. Blondin, D. P. *et al.* Increased brown adipose tissue oxidative capacity in cold-acclimated humans. *J. Clin. Endocrinol. Metab.* **99**, 438–446 (2014).
72. Bakker, L. E. H. *et al.* Brown adipose tissue volume in healthy lean south Asian adults compared with white Caucasians: a prospective, case-controlled observational study. *lancet. Diabetes Endocrinol.* **2**, 210–217 (2014).
73. Rajpathak, S. N. *et al.* The role of insulin-like growth factor-I and its binding proteins in glucose homeostasis and type 2 diabetes. *Diabetes. Metab. Res. Rev.* **25**, 3–12 (2009).
74. Matsushita, M. *et al.* Impact of brown adipose tissue on body fatness and glucose metabolism in healthy humans. *Int. J. Obes.* **38**, 812–817 (2014).

75. Vosselman, M. J., Vijgen, G. H. E. J., Kingma, B. R. M., Brans, B. & van Marken Lichtenbelt, W. D. Frequent extreme cold exposure and brown fat and cold-induced thermogenesis: a study in a monozygotic twin. *PLoS One* **9**, e101653 (2014).
76. Zhang, Z. *et al.* The prevalence and predictors of active brown adipose tissue in Chinese adults. *Eur. J. Endocrinol.* **170**, 359–66 (2014).
77. Choi, H. Y. *et al.* Implication of circulating irisin levels with brown adipose tissue and sarcopenia in humans. *J. Clin. Endocrinol. Metab.* **99**, 2778–2785 (2014).
78. Bredella, M. A., Gill, C. M., Rosen, C. J., Klibanski, A. & Torriani, M. Positive effects of brown adipose tissue on femoral bone structure. *Bone* **58**, 55–8 (2014).
79. Orava, J. *et al.* Brown adipose tissue function is accompanied by cerebral activation in lean but not in obese humans. *J. Cereb. Blood Flow Metab.* **34**, 1018–23 (2014).
80. Cao, Q. *et al.* A pilot study of FDG PET/CT detects a link between brown adipose tissue and breast cancer. *BMC Cancer* **14**, 126 (2014).
81. Hanssen, M. J. W. *et al.* Glucose uptake in human brown adipose tissue is impaired upon fasting-induced insulin resistance. *Diabetologia* **58**, 586–595 (2015).
82. Hanssen, M. J. W. *et al.* Short-term cold acclimation improves insulin sensitivity in patients with type 2 diabetes mellitus. *Nat. Med.* **21**, 6–10 (2015).
83. Hanssen, M. J. W. *et al.* Serum FGF21 levels are associated with brown adipose tissue activity in humans. *Sci. Rep.* **5**, 10275 (2015).
84. Blondin, D. P. *et al.* Contributions of white and brown adipose tissues and skeletal muscles to acute cold-induced metabolic responses in healthy men. *J. Physiol.* **593**, 701–14 (2015).
85. Blondin, D. P. *et al.* Selective Impairment of Glucose but Not Fatty Acid or Oxidative Metabolism in Brown Adipose Tissue of Subjects With Type 2 Diabetes. *Diabetes* **64**, 2388–97 (2015).
86. Dinas, P. C. *et al.* Association between habitual physical activity and brown adipose tissue activity in individuals undergoing PET-CT scan. *Clin. Endocrinol. (Oxf)*. 1–8 (2014). doi:10.1111/cen.12620
87. Vosselman, M. J. *et al.* Low brown adipose tissue activity in endurance trained compared to lean sedentary men. *Int. J. Obes. (Lond)*. 1–7 (2015). doi:10.1038/ijo.2015.130
88. Cypess, A. M. *et al.* Activation of Human Brown Adipose Tissue by a  $\beta$ 3-Adrenergic Receptor Agonist. *Cell Metab.* **21**, 33–38 (2015).
89. Nirengi, S., Yoneshiro, T., Sugie, H., Saito, M. & Hamaoka, T. Human brown adipose tissue assessed by simple, noninvasive near-Infrared time-resolved spectroscopy. *Obesity* **23**, 973–980 (2015).
90. Carey, A. L. *et al.* Chronic ephedrine administration decreases brown adipose tissue activity in a randomised controlled human trial: implications for obesity. *Diabetologia* **58**, 1045–1054 (2015).
91. Wei, H. *et al.* A clinical approach to brown adipose tissue in the para-aortic area of the human thorax. *PLoS One* **10**, 1–18 (2015).
92. Hew-Butler, T. *et al.* Plasma irisin in runners and nonrunners: no favorable metabolic associations in humans. *Physiol. Rep.* **3**, e12262–e12262 (2015).
93. Raiko, J. *et al.* Brown adipose tissue triglyceride content is associated with decreased insulin sensitivity, independently of age and obesity. *Diabetes. Obes. Metab.* **17**, 516–9 (2015).
94. Wang, Q. *et al.* Brown adipose tissue activation is inversely related to central obesity and metabolic parameters in adult human. *PLoS One* **10**, e0123795 (2015).
95. Puar, T. *et al.* Genotype-dependent brown adipose tissue activation in patients with pheochromocytoma and paraganglioma. *J. Clin. Endocrinol. Metab.* **101**, 224–232 (2016).
96. Hanssen, M. J. W. *et al.* Short-term Cold Acclimation Recruits Brown Adipose Tissue in Obese Humans. *Diabetes* **65**, 1179–89 (2016).



97. Singhal, V. *et al.* Effect of Chronic Athletic Activity on Brown Fat in Young Women. *PLoS One* **11**, e0156353 (2016).
98. Ozguven, S., Ones, T., Yilmaz, Y., Turoglu, H. T. & Imeryuz, N. The role of active brown adipose tissue in human metabolism. *Eur. J. Nucl. Med. Mol. Imaging* **43**, 355–61 (2016).
99. Chondronikola, M. *et al.* Brown Adipose Tissue Is Linked to a Distinct Thermoregulatory Response to Mild Cold in People. *Front. Physiol.* **7**, 129 (2016).
100. Chondronikola, M. *et al.* Brown Adipose Tissue Activation Is Linked to Distinct Systemic Effects on Lipid Metabolism in Humans. *Cell Metab.* **23**, 1200–6 (2016).
101. Gifford, A., Towse, T. F., Walker, R. C., Avison, M. J. & Welch, E. B. Characterizing Active and Inactive Brown Adipose Tissue in Adult Humans Using PET-CT and MR Imaging. *Am. J. Physiol. - Endocrinol. Metab.* ajpendo.00482.2015 (2016). doi:10.1152/ajpendo.00482.2015
102. Yoneshiro, T. *et al.* Brown adipose tissue is involved in the seasonal variation of cold-induced thermogenesis in humans. *Am. J. Physiol. Regul. Integr. Comp. Physiol.* ajpregu.00057.2015 (2016). doi:10.1152/ajpregu.00057.2015
103. Ramage, L. E. *et al.* Glucocorticoids Acutely Increase Brown Adipose Tissue Activity in Humans, Revealing Species-Specific Differences in UCP-1 Regulation. *Cell Metab.* **24**, 130–141 (2016).
104. Bahler, L. *et al.* Differences in Sympathetic Nervous Stimulation of Brown Adipose tissue between the young and old and the lean and obese. *J. Nucl. Med.* **57**, 1–27 (2015).
105. Bahler, L., Holleman, F., Booiij, J., Hoekstra, J. B. & Verberne, H. J. Interobserver and intraobserver variability for the assessment of brown adipose tissue activity on 18F-FDG PET-CT. *Nucl. Med. Commun.* **1** (2015). doi:10.1097/MNM.0000000000000450
106. Salem, V. *et al.* Glucagon increases energy expenditure independently of brown adipose tissue activation in humans. *Diabetes, Obes. Metab.* **18**, 72–81 (2016).
107. Bahler, L., Deelen, J. W., Hoekstra, J. B., Holleman, F. & Verberne, H. J. Seasonal influence on stimulated BAT activity in prospective trials: a retrospective analysis of BAT visualized on 18F-FDG PET-CTs and 123I-mIBG SPECT-CTs. *J. Appl. Physiol.* **120**, 1418–23 (2016).
108. van der Lans, A. a. J. J., Vosselman, M. J., Hanssen, M. J. W., Brans, B. & van Marken Lichtenbelt, W. D. Supraclavicular skin temperature and BAT activity in lean healthy adults. *J. Physiol. Sci.* **66**, 77–83 (2016).
109. Gatidis, S. *et al.* Is It Possible to Detect Activated Brown Adipose Tissue in Humans Using Single-Time-Point Infrared Thermography under Thermoneutral Conditions? Impact of BMI and Subcutaneous Adipose Tissue Thickness. *PLoS One* **11**, e0151152 (2016).
110. Nirengi, S. *et al.* Assessment of human brown adipose tissue density during daily ingestion of thermogenic capsinoids using near-infrared time-resolved spectroscopy. *J. Biomed. Opt.* **21**, 91305 (2016).
111. Shao, X., Shao, X., Wang, X. & Wang, Y. Characterization of brown adipose tissue 18F-FDG uptake in PET/CT imaging and its influencing factors in the Chinese population. *Nucl. Med. Biol.* **43**, 7–11 (2016).
112. Hibi, M. *et al.* Brown adipose tissue is involved in diet-induced thermogenesis and whole-body fat utilization in healthy humans. *Int. J. Obes. (Lond)*. **40**, 1655–1661 (2016).
113. Chen, Y. *et al.* Exosomal microRNA miR-92a concentration in serum reflects human brown fat activity. *Nat. Commun.* **7**, 11420 (2016).
114. Lee, P. *et al.* Brown Adipose Tissue Exhibits a Glucose-Responsive Thermogenic Biorhythm in Humans. *Cell Metab.* **23**, 1–8 (2016).
115. Becker, A. S., Nagel, H. W., Wolfrum, C. & Burger, I. A. Anatomical Grading for Metabolic Activity of Brown Adipose Tissue. *PLoS One* **11**, e0149458 (2016).
116. Takx, R. A. P. *et al.* Supraclavicular Brown Adipose Tissue 18F-FDG Uptake and Cardiovascular Disease. *J. Nucl. Med.* **57**, 1221–5 (2016).
117. Shao, X. *et al.* The role of active brown adipose tissue (aBAT) in lipid metabolism in healthy Chinese adults. *Lipids Health Dis.* **15**, 138 (2016).

118. Muzik, O., Mangner, T. J., Leonard, W. R., Kumar, A. & Granneman, J. G. Sympathetic Innervation of Cold-Activated Brown and White Fat in Lean Young Adults. *J. Nucl. Med.* (2016). doi:10.2967/jnumed.116.180992
119. Blondin, D. P. *et al.* Four-week cold acclimation in adult humans shifts uncoupling thermogenesis from skeletal muscles to brown adipose tissue. *J. Physiol.* (2016). doi:10.1113/JP273395
120. Blondin, D. P. *et al.* Inhibition of Intracellular Triglyceride Lipolysis Suppresses Cold-Induced Brown Adipose Tissue Metabolism and Increases Shivering in Humans. *Cell Metab.* **25**, 438–447 (2017).
121. Gerngroß, C., Schretter, J., Klingenspor, M., Schwaiger, M. & Fromme, T. Active brown fat during 18 FDG-PET/CT imaging defines a patient group with characteristic traits and an increased probability of brown fat redetection. *J. Nucl. Med.* jnumed.116.183988 (2017). doi:10.2967/jnumed.116.183988
122. Hussein, S. *et al.* Automatic Segmentation and Quantification of White and Brown Adipose Tissues from PET/CT Scans. *IEEE Trans. Med. Imaging* **36**, 734–744 (2017).
123. Yoneshiro, T. *et al.* Tea catechin and caffeine activate brown adipose tissue and increase cold-induced thermogenic capacity in humans. *Am. J. Clin. Nutr.* ajcn144972 (2017). doi:10.3945/ajcn.116.144972

**Table S2.** Lin's concordance coefficient for the inter-observer reliability of BAT volume and activity by study cohort and by threshold of HU and SUV for quantification of BAT.

|                                            | BARCIST 1.0 |                 | HU: -180, -10; SUV: 1.5 |                 | HU: -250, -50; SUV: 2.0 |                 | HU: NA; SUV: 2.0 |                 |
|--------------------------------------------|-------------|-----------------|-------------------------|-----------------|-------------------------|-----------------|------------------|-----------------|
| <b>Young normal-weight adults</b>          |             |                 |                         |                 |                         |                 |                  |                 |
| Volume                                     | 0.962       | (0.858 - 0.990) | 0.953                   | (0.833 - 0.987) | 0.976                   | (0.908 - 0.994) | 0.951            | (0.827 - 0.987) |
| SUV <sub>mean</sub>                        | 0.980       | (0.930 - 0.934) | 0.964                   | (0.877 - 0.990) | 0.982                   | (0.933 - 0.996) | 0.968            | (0.908 - 0.989) |
| SUV <sub>peak</sub>                        | 1.000       |                 | 1.000                   |                 | 1.000                   |                 | 1.000            |                 |
| <b>Young overweight-obese adults</b>       |             |                 |                         |                 |                         |                 |                  |                 |
| Volume                                     | 0.990       | (0.961 - 0.997) | 0.993                   | (0.973 - 0.998) | 0.993                   | (0.974 - 0.998) | 0.986            | (0.954 - 0.996) |
| SUV <sub>mean</sub>                        | 0.997       | (0.989 - 0.999) | 0.996                   | (0.985 - 0.999) | 0.992                   | (0.975 - 0.998) | 0.989            | (0.961 - 0.997) |
| SUV <sub>peak</sub>                        | 0.996       | (0.984 - 0.999) | 0.996                   | (0.984 - 0.999) | 0.996                   | (0.986 - 0.999) | 0.996            | (0.984 - 0.999) |
| <b>Middle-aged overweight-obese adults</b> |             |                 |                         |                 |                         |                 |                  |                 |
| Volume                                     | 0.996       | (0.983 - 0.999) | 0.992                   | (0.972 - 0.998) | 0.999                   | (0.994 - 1.000) | 0.983            | (0.941 - 0.995) |
| SUV <sub>mean</sub>                        | 0.999       | (0.998 - 1.000) | 0.999                   | (0.998 - 1.000) | 1.000                   | (0.999 - 1.000) | 0.961            | (0.951 - 0.997) |
| SUV <sub>peak</sub>                        | 0.983       | (0.935 - 0.995) | 0.982                   | (0.935 - 0.995) | 0.993                   | (0.987 - 0.996) | 0.906            | (0.695 - 0.973) |

Data are means and 95% confidence intervals.

Strength of the agreement: from 1.000 to 0.999 (almost perfect), from <0.999 to 0.95 (substantial), from <0.95 to 0.90 (moderate), <0.90 (poor).

BARCIST 1.0: HU:-190,-10; SUV: Individualized [1.2/(lean body mass/body mass)]; BAT: Brown adipose tissue; BMI: Body mass index; HU: Hounsfield units; SUV: Standardized uptake value.

**Table S3.** Absolute and relative (%) differences between thresholds in brown adipose tissue volume and activity by study cohort.

|                                                     |          | Volume (ml) |         | SUV <sub>mean</sub> (g/ml) |          | SUV <sub>peak</sub> (g/ml) |         |
|-----------------------------------------------------|----------|-------------|---------|----------------------------|----------|----------------------------|---------|
| Young lean adults                                   |          | Mean        | 95%CI   | Mean                       | 95%CI    | Mean                       | 95%CI   |
| BARCIST 1.0 vs. HU: NA; SUV: 2.0                    | Absolute | 249***      | 186 312 | 0.4**                      | 0.2 0.6  | 0                          | 0 0.1   |
|                                                     | %        | +155        |         | -9                         |          | -0.2                       |         |
| BARCIST 1.0 vs. HU: -250, -50; SUV: 2.0             | Absolute | 92**        | 79 106  | 0.8***                     | 0.6 0.9  | 0.1                        | 0 0.2   |
|                                                     | %        | -57         |         | +18                        |          | -0.8                       |         |
| BARCIST 1.0 vs. HU: -180, -10; SUV: 1.5             | Absolute | 0           | -5 5    | 0                          | 0 0.1    | 0                          | 0 0     |
|                                                     | %        | 0           |         | 0                          |          | 0                          |         |
| HU: -250, -50; SUV: 2.0 vs. HU: NA; SUV: 2.0        | Absolute | 341***      | 267 415 | 1.2***                     | 0.9 1.4  | 0.2                        | 0 0.3   |
|                                                     | %        | +500        |         | -23                        |          | +1                         |         |
| HU: -250, -50; SUV: 2.0 vs. HU: -180, -10; SUV: 1.5 | Absolute | 92***       | 77 108  | 0.8***                     | 0.6 1.0  | 0.1                        | 0 0.2   |
|                                                     | %        | +135        |         | -16                        |          | +1                         |         |
| HU: -180, -10; SUV: 1.5 vs. HU: NA; SUV: 2.0        | Absolute | 249***      | 186 311 | 0.4                        | 0.1 0.6  | 0                          | 0 0.1   |
|                                                     | %        | +155        |         | -9                         |          | 0                          |         |
| Young overweight/obese adults                       |          |             |         |                            |          |                            |         |
| BARCIST 1.0 vs. HU: NA; SUV: 2.0                    | Absolute | 244**       | 114 374 | 0.6                        | 0.1 1.1  | 0.1                        | 0.3 0.1 |
|                                                     | %        | +207        |         | -16                        |          | +1                         |         |
| BARCIST 1.0 vs. HU: -250, -50; SUV: 2.0             | Absolute | 49**        | 29 70   | 0.1                        | 0 0.3    | 0.6                        | 0.2 1.1 |
|                                                     | %        | -42         |         | +3                         |          | -6                         |         |
| BARCIST 1.0 vs. HU: -180, -10; SUV: 1.5             | Absolute | 47**        | 24 69   | 0.5*                       | 0.4 0.7  | 0                          | 0 0     |
|                                                     | %        | +40         |         | -14                        |          | 0                          |         |
| HU: -250, -50; SUV: 2.0 vs. HU: NA; SUV: 2.0        | Absolute | 294**       | 146 442 | 0.7*                       | 0.3 1.2  | 0.7                        | 0.2 1.2 |
|                                                     | %        | +430        |         | -19                        |          | +7                         |         |
| HU: -250, -50; SUV: 2.0 vs. HU: -180, -10; SUV: 1.5 | Absolute | 96***       | 64 128  | 0.7*                       | 0.6 0.8  | 0.6                        | 0.2 1.1 |
|                                                     | %        | +141        |         | -17                        |          | +6                         |         |
| HU: -180, -10; SUV: 1.5 vs. HU: NA; SUV: 2.0        | Absolute | 198**       | 73 322  | 0.1                        | -0.3 0.4 | 0.1                        | 0.1 0.3 |
|                                                     | %        | +120        |         | -2                         |          | +1                         |         |
| Middle-aged overweight/obese adults                 |          |             |         |                            |          |                            |         |

|                                                     |          |       |        |      |         |      |         |
|-----------------------------------------------------|----------|-------|--------|------|---------|------|---------|
| BARCIST 1.0 vs. HU: NA; SUV: 2.0                    | Absolute | 106** | 42 170 | 0.1  | 0.1 0.3 | 0.6* | 0.2 0.9 |
|                                                     | %        | +124  |        | +6   |         | +10  |         |
| BARCIST 1.0 vs. HU: -250, -50; SUV: 2.0             | Absolute | 46**  | 28 64  | 0.3* | 0.2 0.5 | 0.3  | 0.1 0.8 |
|                                                     | %        | -54   |        | +13  |         | -6   |         |
| BARCIST 1.0 vs. HU: -180, -10; SUV: 1.5             | Absolute | 38**  | 18 58  | 0.3* | 0.2 0.4 | 0    | 0 0.1   |
|                                                     | %        | +45   |        | -11  |         | -0.7 |         |
| HU: -250, -50; SUV: 2.0 vs. HU: NA; SUV: 2.0        | Absolute | 152** | 78 226 | 0.2  | 0 0.4   | 0.9* | 0.3 1.5 |
|                                                     | %        | +384  |        | -6   |         | +16  |         |
| HU: -250, -50; SUV: 2.0 vs. HU: -180, -10; SUV: 1.5 | Absolute | 84*** | 60 108 | 0.6* | 0.5 0.7 | 0.3  | 0.2 0.8 |
|                                                     | %        | +213  |        | -21  |         | +5   |         |
| HU: -180, -10; SUV: 1.5 vs. HU: NA; SUV: 2.0        | Absolute | 68    | 13 123 | 0.4* | 0.3 0.5 | 0.6* | 0.3 0.9 |
|                                                     | %        | +55   |        | +19  |         | +10  |         |

Data are means and 95% confidence intervals.

BMI: Body mass index; HU: Hounsfield units; BARCIST 1.0: HU:-190,-10; SUV: Individualized [ $1.2/(\text{lean body mass}/\text{body mass})$ ]; NA: Not applied; SUV: Standardized uptake value. \*  $P \leq 0.05$ , \*\*  $P \leq 0.01$ , \*\*\*  $P \leq 0.001$ . See Figure 1 for graphical representation.

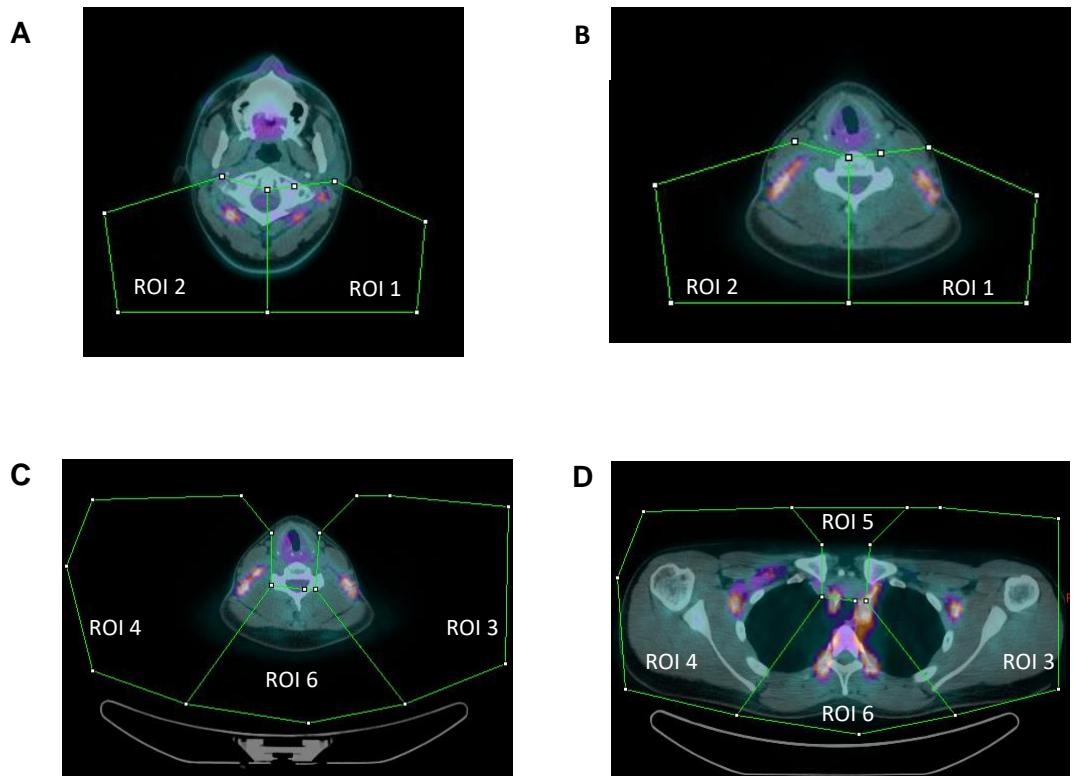

**Figure S1.** 3D-Axial technique: definition of the region of interest (ROI) drawn in the  $^{18}\text{F}$ -fluorodeoxyglucose-Positron Emission Tomography/Computed Tomography images of a representative individual. **A.** ROI 1 and 2 in *atlas*. **B.** ROIs 1 and 2 in the end *cervical vertebrae 6*. **C.** ROI 3, 4 and 6 in the beginning of *cervical vertebrae 7*. **D.** ROI 3, 4, 5 and 6 in *thoracic vertebrae 4*.

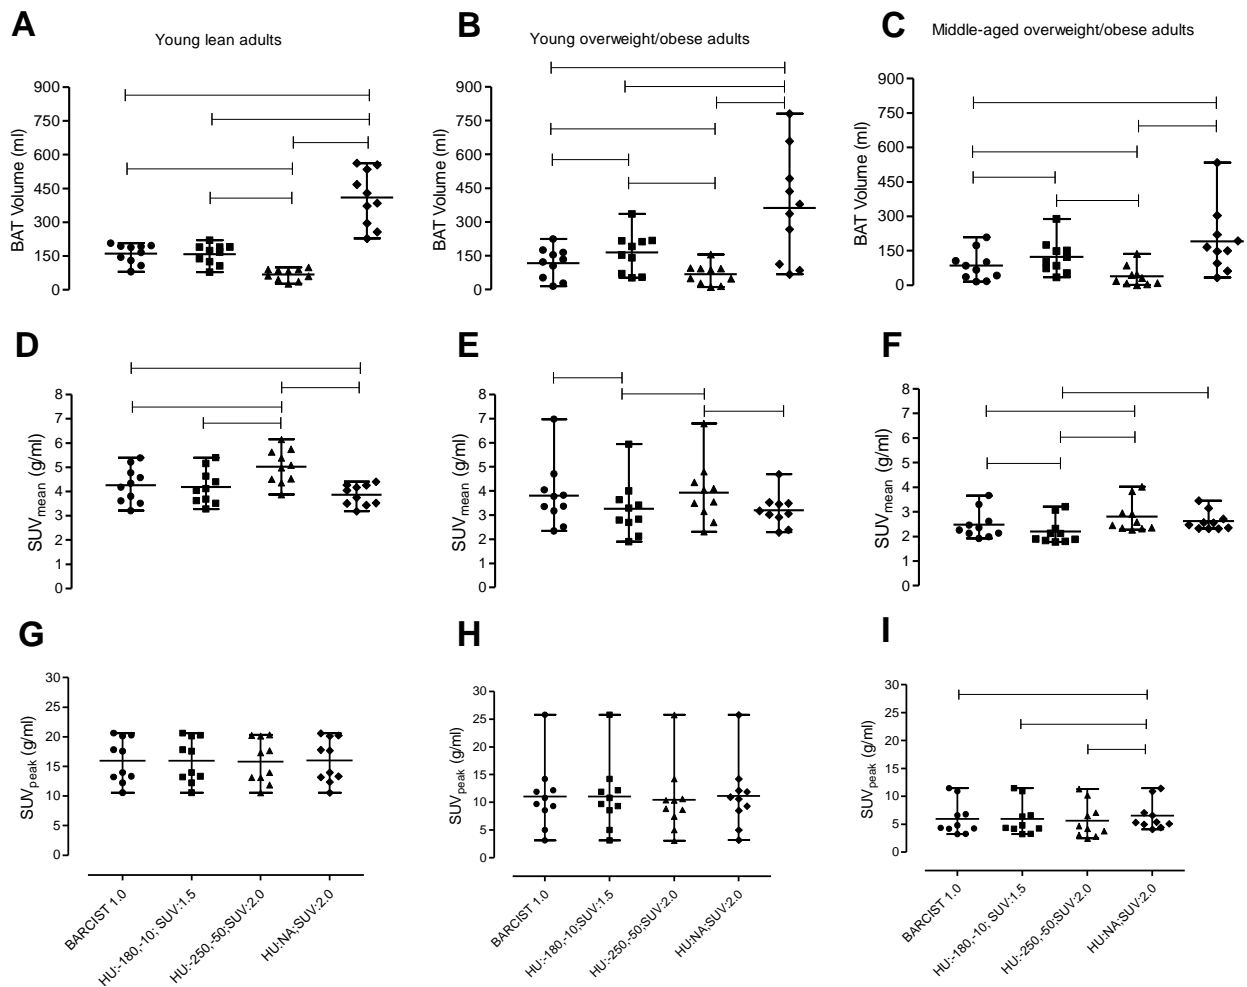

**Figure S2.** Brown adipose tissue (BAT) volume and activity determined by various thresholds of Hounsfield unit (HU) and Standardized uptake value (SUV) for three study cohorts. BAT volume (A-C),  $SUV_{mean}$  (D-F), and  $SUV_{peak}$  (G-I) were determined in young lean adults (A, D, G), young overweight/obese adults (B, E, H), and middle-aged overweight/obese adults (C, F, I). Data are means and 95% confident interval ( $n=10$  per cohort). Significant differences between thresholds are indicated by parallel horizontal bars (all  $P \leq 0.05$ ). BARCIST 1.0: HU:-190,-10; SUV: Individualized [ $1.2/(\text{lean body mass}/\text{body mass})$ ]; BMI: Body mass index; NA: Not applied. See Table S4 for exact absolute and relative differences between thresholds.
